# Supplementary material for: Is the BioNTech-Pfizer COVID-19 vaccination effective in elderly populations? Results from population data from Bavaria, Germany
Source: medRxiv preprint, doi:10.1101/2021.08.19.21262266, version 1 (2021-08-21)
Supplement: S1 Figure. [file 262266_file02.docx]

Is the BioNTech-Pfizer COVID-19 vaccination effective in elderly populations? Results from population data from Bavaria, Germany

Delphina Gomes1¶, Andreas Beyerlein1¶, Katharina Katz2, Gabriele Hoelscher2, Uta Nennstiel2, Bernhard Liebl2, Klaus Überla3, Rüdiger von Kries1*

1 Institute of Social Pediatrics and Adolescent Medicine, Division of Pediatric Epidemiology, Ludwig-Maximilians-University, Munich, Germany

2 Bavarian Health and Food Safety Authority, Oberschleissheim, Germany

3 Institute of Clinical and Molecular Virology, Universitätsklinikum Erlangen, Friedrich-Alexander-Universität Erlangen-Nürnberg, Erlangen, Germany

*****[ruediger.kries@med.uni-muenchen.de](mailto:ruediger.kries@med.uni-muenchen.de)

¶These authors contributed equally to this work.

**S1 Figure. Vaccine efficacy to prevent COVID-19 infection and related outcomes after at least one BNT162b2 vaccine dose compared to none in Bavarian persons aged 80 years and above.**


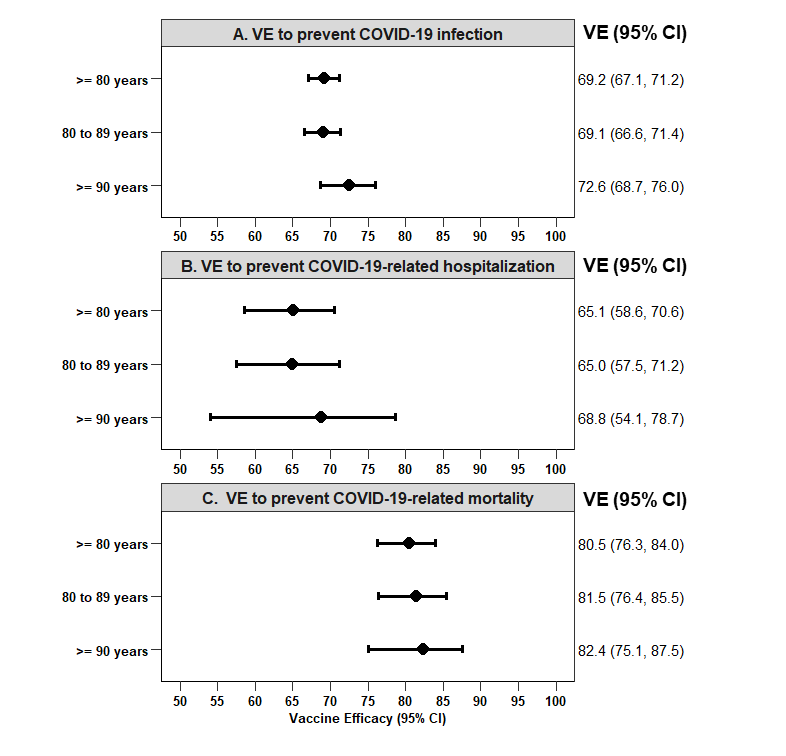
Vaccine efficacy was calculated as 1 – HR and are adjusted for sex. CI, confidence interval; HR, hazards ratio; VE, vaccine efficacy.
